# Supplementary material
Source: PubMed Central journal article supplement (PMC2941827)
Supplement: ajn0032-0156-s01.pdf [file ajn0032-0156-s01.pdf]

# Supplementary Figure 1

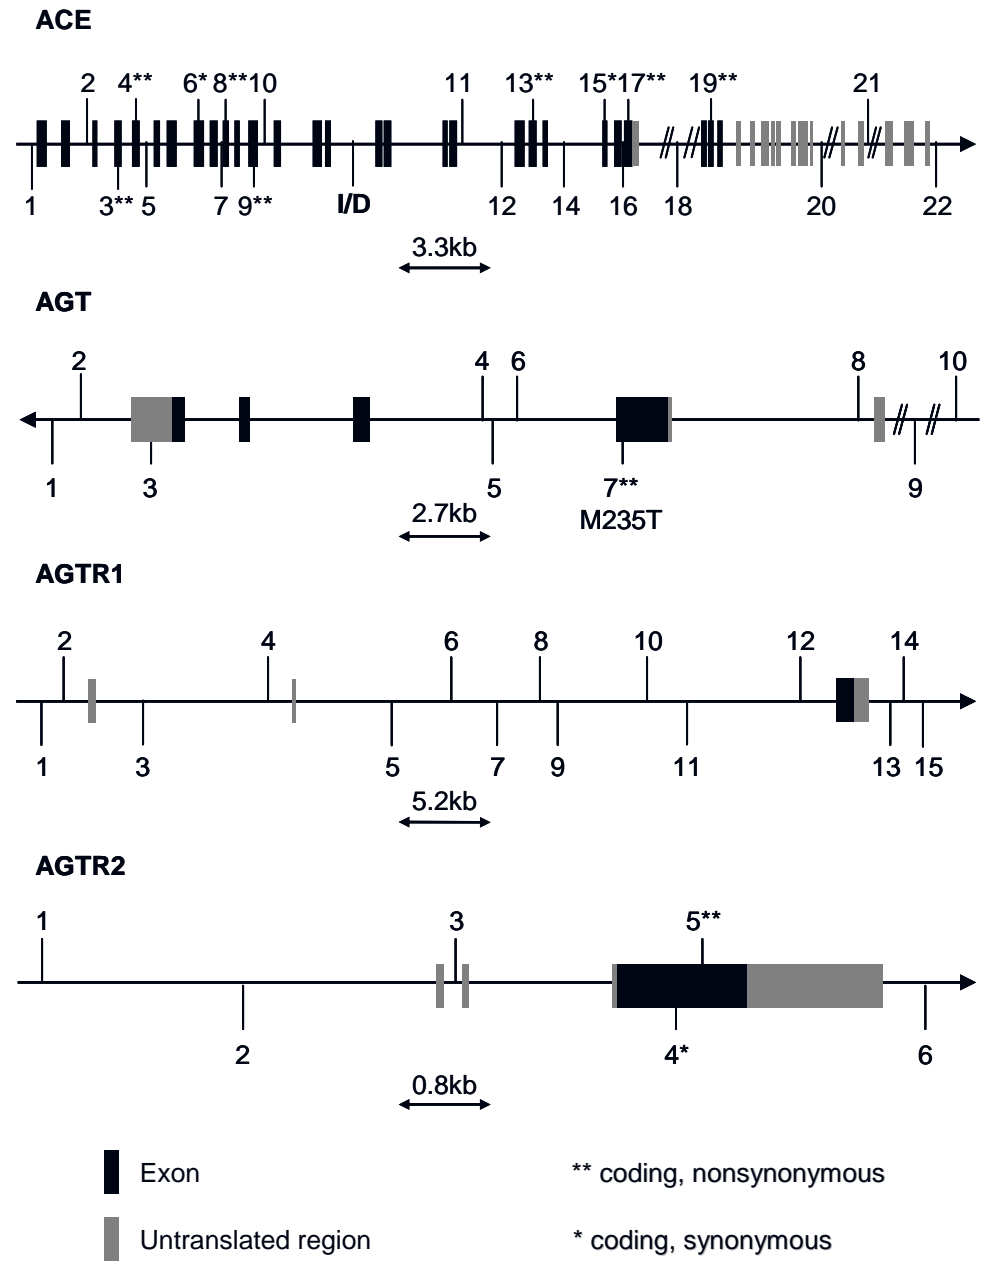

# Supplementary Figure 2

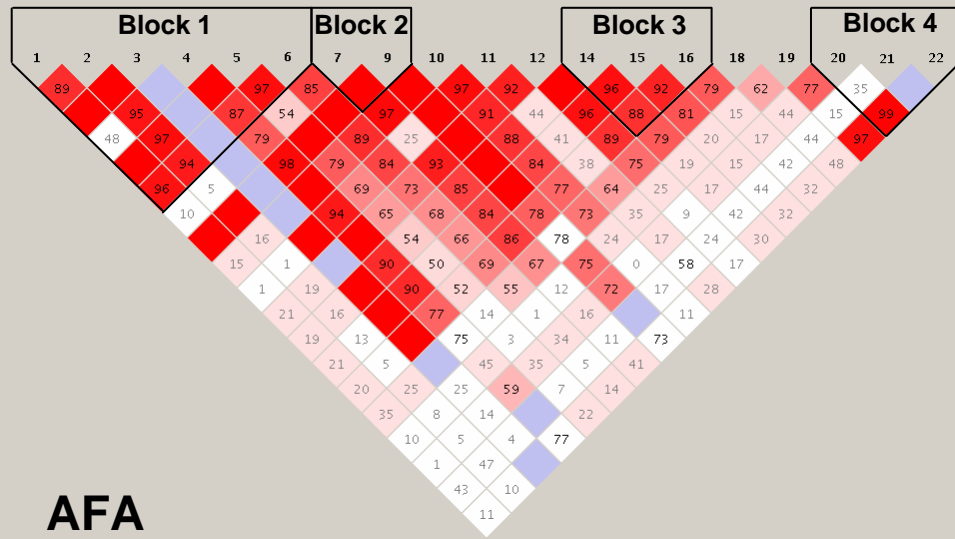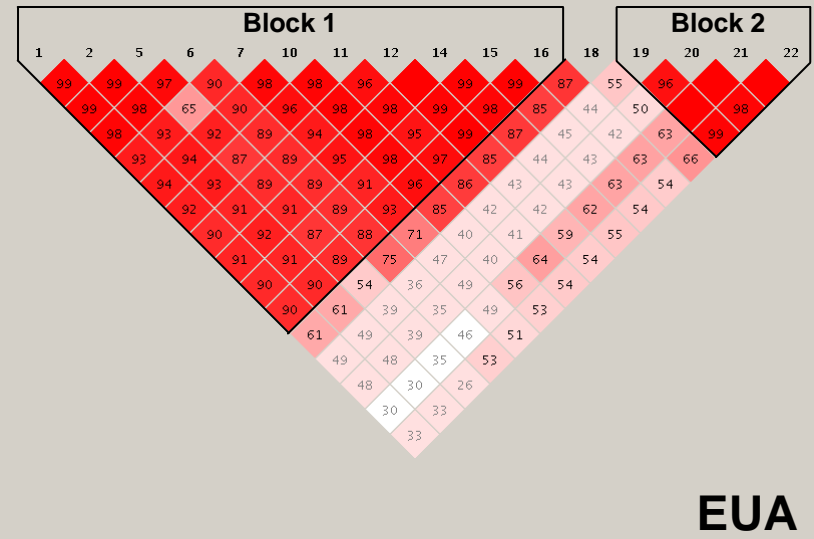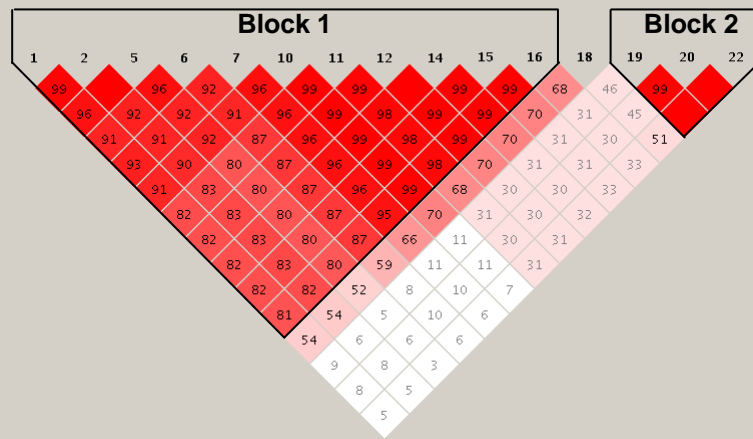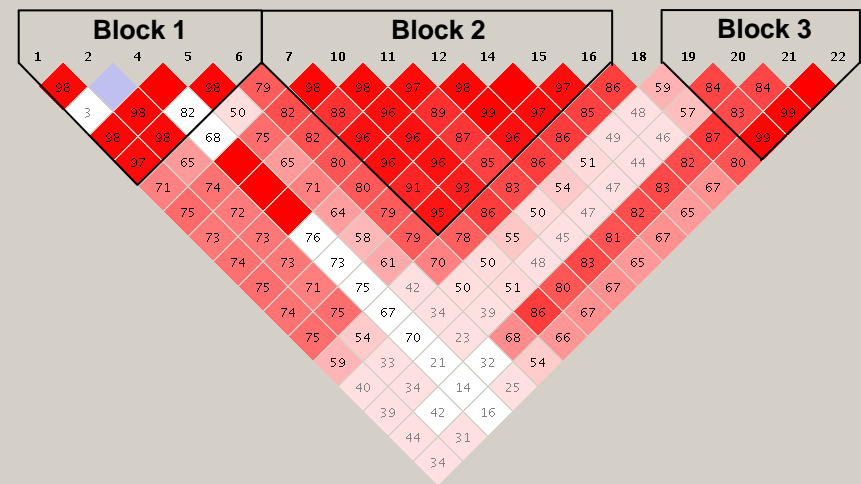

**CHN**

**HIS**

# Supplementary Figure 3

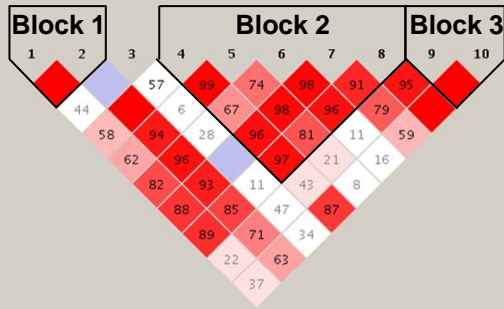

AFA

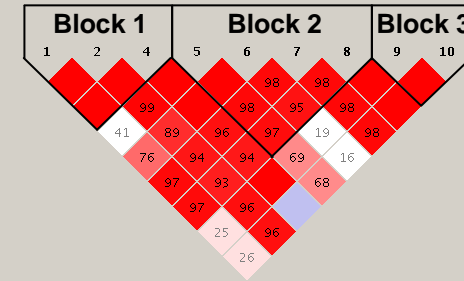

EUA

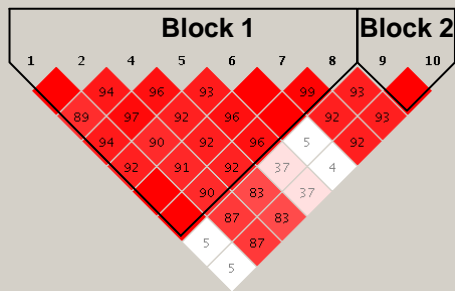

CHN

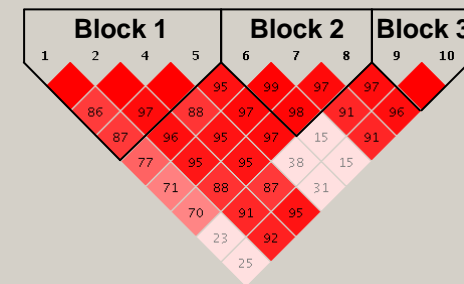

HIS

# Supplementary Figure 4

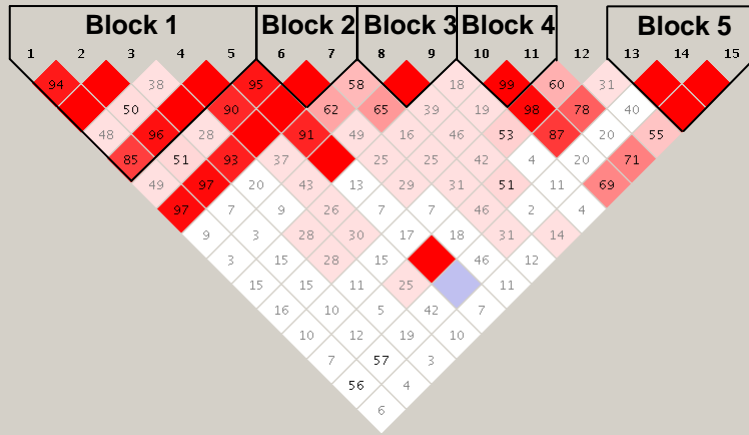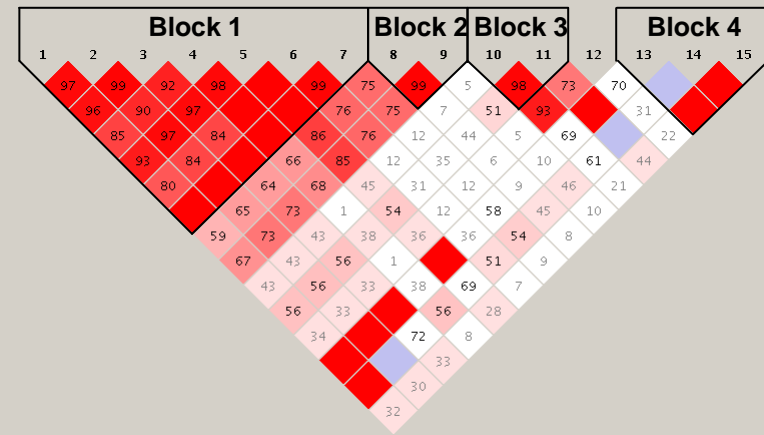

**AFA**

**EUA**

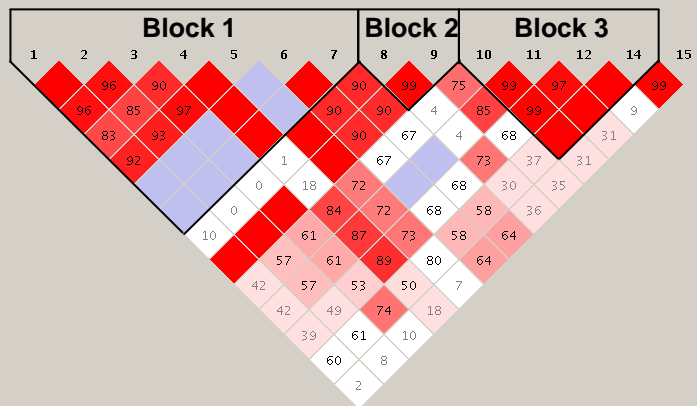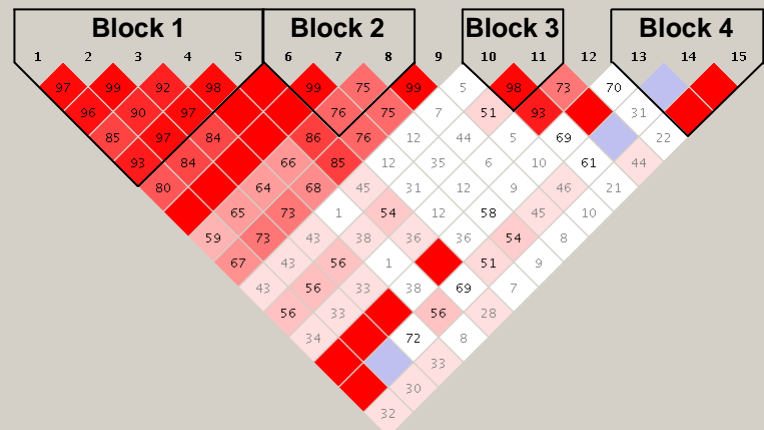

**CHN**

**HIS**

# Supplementary Figure 5

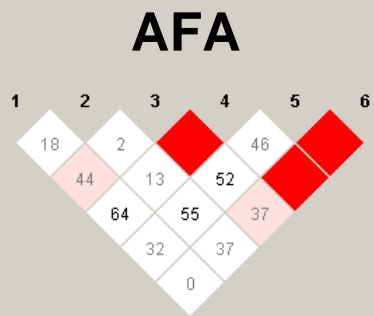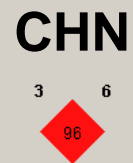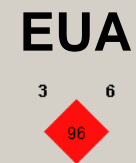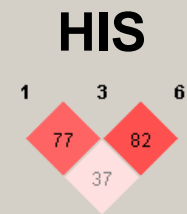

## **SUPPLEMENTARY FIGURE LEGENDS**

**Supplementary Figure 1. ACE, AGT, AGTR1, and AGTR2 SNPs.** SNPs genotyped in ACE, AGT, AGTR1, and AGTR2 cover 23kb, 44kb, 52kb, and 8kb, respectively. Further details on these SNPs and the haplotype blocks can be found in Supplementary Table 2 and Supplementary Figures 2-5.

**Supplementary Figure 2.** *ACE* SNPs, D' and haplotype block structure for the four racial/ethnic groups.

**Supplementary Figure 3.** *AGT* SNPs, D' and haplotype block structure for the four racial/ethnic groups.

**Supplementary Figure 4.** *AGTR1* SNPs, D' and haplotype block structure for the four racial/ethnic groups.

**Supplementary Figure 5.** *AGTR2* SNPs and D' for the four racial/ethnic groups.
