# Supplementary material
Source: PubMed Central journal article supplement (PMC2941827)
Supplement: ajn0032-0156-s02.pdf [file ajn0032-0156-s02.pdf]

**Supplementary Table 1. Baseline demographics according to race/ethnicity.**

|                                                 | <b>African American<br/>N=712</b> | <b>Chinese<br/>N=718</b> | <b>Caucasian<br/>N=712</b> | <b>Hispanic<br/>N=705</b> | <b>Combined<br/>N=2847</b> |
|-------------------------------------------------|-----------------------------------|--------------------------|----------------------------|---------------------------|----------------------------|
| Age (years)                                     | 62±10                             | 62±10                    | 61±10                      | 61±10                     | 62±10                      |
| Female (%)                                      | 55                                | 52                       | 53                         | 54                        | 53                         |
| Hypertension (%)                                | 56                                | 37                       | 39                         | 42                        | 44                         |
| Diabetes (%)                                    | 28                                | 23                       | 13                         | 31                        | 24                         |
| Mean MDRD eGFR, mL/min/1.73m <sup>2</sup>       | 84±19                             | 80±16                    | 75±20                      | 80±18                     | 80±18                      |
| MDRD eGFR <60 (%)                               | 7                                 | 10                       | 14                         | 8                         | 10                         |
| Median UAE, mg/g                                | 5.2 (3.2, 12.4)                   | 6.8 (4.0, 12.8)          | 4.5 (3.1, 8.3)             | 6.2 (3.8, 12.8)           | 5.6 (3.4, 11.6)            |
| UAE ≥17/25 mg/g (%)*                            | 16                                | 17                       | 10                         | 16                        | 15                         |
| Mean cystatin C eGFR, mL/min/1.73m <sup>2</sup> | 93±24                             | 91±21                    | 85±19                      | 85±20                     | 88±22                      |
| Cystatin C eGFR <60 (%)                         | 6                                 | 6                        | 11                         | 9                         | 8                          |

mean values ± standard distribution or percent distribution or median values with interquartile range  
eGFR= estimated GFR; UAE= urine albumin excretion.

\* UAE ≥ 17 mg/g in men or ≥ 25 mg/g in women.

**Supplementary Table 2. Single nucleotide polymorphisms in the ACE, AGT, AGTR1, and AGTR2 genes.**

This table displays the single nucleotide polymorphisms as well as the function, minor and major alleles, and minor allele frequencies of these polymorphisms. The minor allele was based on the combined analysis.

|              | SNP                | Function              | Major Allele | Minor Allele | Minor Allele Frequency |                  |         |           |          |
|--------------|--------------------|-----------------------|--------------|--------------|------------------------|------------------|---------|-----------|----------|
|              |                    |                       |              |              | Combined               | African American | Chinese | Caucasian | Hispanic |
| <b>ACE</b>   |                    |                       |              |              |                        |                  |         |           |          |
| 1            | rs4291             | noncoding             | T            | A            | 0.35                   | 0.35             | 0.36    | 0.36      | 0.32     |
| 2            | rs4295             | noncoding             | G            | C            | 0.37                   | 0.42             | 0.35    | 0.36      | 0.34     |
| 3            | rsMESA03†          | coding, nonsynonymous | G            | A            | 0.003                  | 0.01             | 0       | 0         | 0.0007   |
| 4            | rs4303 (A261S)     | coding, nonsynonymous | C            | A            | 0.02                   | 0.07             | 0       | 0.0007    | 0.01     |
| 5            | rs4305             | noncoding             | A            | G            | 0.50                   | 0.22             | 0.64    | 0.56      | 0.57     |
| 6            | rs4309             | coding, synonymous    | G            | A            | 0.44                   | 0.19             | 0.66    | 0.42      | 0.48     |
| 7            | rs4311             | noncoding             | G            | A            | 0.37                   | 0.25             | 0.34    | 0.48      | 0.40     |
| 8            | rs12720746 (V524A) | coding, nonsynonymous | A            | G            | 0.0004                 | 0                | 0       | 0         | 0.001    |
| 9            | rs12709426 (D592G) | coding, nonsynonymous | A            | G            | 0.01                   | 0.04             | 0       | 0         | 0.01     |
| 10           | rs4316             | noncoding             | A            | G            | 0.49                   | 0.60             | 0.33    | 0.54      | 0.50     |
| 11           | rs4351             | noncoding             | A            | G            | 0.47                   | 0.47             | 0.40    | 0.53      | 0.46     |
| 12           | rs4353             | noncoding             | A            | G            | 0.50                   | 0.41             | 0.60    | 0.47      | 0.51     |
| 13           | rs4976 (I444T)     | coding, nonsynonymous | A            | G            | 0.0005                 | 0.001            | 0.0007  | 0         | 0        |
| 14           | rs4359             | noncoding             | G            | A            | 0.46                   | 0.43             | 0.40    | 0.54      | 0.47     |
| 15           | rs4362             | coding, synonymous    | G            | A            | 0.45                   | 0.43             | 0.40    | 0.53      | 0.45     |
| 16           | rs4363             | noncoding             | A            | G            | 0.46                   | 0.43             | 0.40    | 0.54      | 0.46     |
| 17           | rs4980 (R1279Q)    | coding, nonsynonymous | G            | A            | 0.003                  | 0.00             | 0       | 0.005     | 0.004    |
| 18           | rs4461142          | noncoding             | G            | A            | 0.37                   | 0.18             | 0.42    | 0.48      | 0.40     |
| 19           | rs4459610 (K715N)  | coding, nonsynonymous | A            | G            | 0.46                   | 0.57             | 0.27    | 0.57      | 0.45     |
| 20           | rs8066276          | noncoding             | A            | G            | 0.42                   | 0.36             | 0.27    | 0.61      | 0.45     |
| 21           | rs4277404          | noncoding             | G            | A            | 0.02                   | 0.01             | 0       | 0.06      | 0.03     |
| 22           | rs4968591          | noncoding             | A            | G            | 0.27                   | 0.18             | 0.22    | 0.40      | 0.30     |
| <b>AGT</b>   |                    |                       |              |              |                        |                  |         |           |          |
| 1            | rs7536290          | noncoding             | A            | G            | 0.26                   | 0.35             | 0.25    | 0.15      | 0.30     |
| 2            | rs943580           | noncoding             | G            | A            | 0.31                   | 0.19             | 0.16    | 0.59      | 0.31     |
| 3            | rs5044             | noncoding             | A            | C            | 0.003                  | 0.01             | 0       | 0         | 0.002    |
| 4            | rs3789670          | noncoding             | G            | A            | 0.16                   | 0.23             | 0.20    | 0.10      | 0.12     |
| 5            | rs3789671          | noncoding             | C            | A            | 0.34                   | 0.36             | 0.54    | 0.18      | 0.28     |
| 6            | rs2478545          | noncoding             | G            | A            | 0.34                   | 0.45             | 0.30    | 0.23      | 0.38     |
| 7            | rs699 (M235T)#     | coding, nonsynonymous | C            | T            | 0.32                   | 0.20             | 0.16    | 0.59      | 0.34*    |
| 8            | rs2148582          | noncoding             | G            | A            | 0.32                   | 0.20             | 0.16    | 0.57      | 0.33*    |
| 9            | rs7549009          | noncoding             | G            | A            | 0.30                   | 0.31             | 0.49    | 0.10      | 0.30     |
| 10           | rs1326886          | noncoding             | A            | G            | 0.26                   | 0.17             | 0.49    | 0.10      | 0.28*    |
| <b>AGTR1</b> |                    |                       |              |              |                        |                  |         |           |          |
| 1            | rs409742           | noncoding             | A            | G            | 0.18                   | 0.23             | 0.12    | 0.21      | 0.16     |
| 2            | rs422858           | noncoding             | A            | C            | 0.17                   | 0.23             | 0.09    | 0.21      | 0.16     |
| 3            | rs2638363          | noncoding             | G            | A            | 0.20                   | 0.34             | 0.09    | 0.21      | 0.17     |
| 4            | rs2131127          | noncoding             | G            | A            | 0.44                   | 0.68             | 0.39    | 0.33      | 0.37     |
| 5            | rs2638360          | noncoding             | A            | G            | 0.10                   | 0.03             | 0.07    | 0.20      | 0.09     |
| 6            | rs4681443          | noncoding             | G            | A            | 0.27                   | 0.61             | 0.07    | 0.17      | 0.22*    |
| 7            | rs718858           | noncoding             | G            | A            | 0.16                   | 0.24             | 0.07    | 0.17      | 0.14     |

|    |           |           |     |      |      |      |      |      |
|----|-----------|-----------|-----|------|------|------|------|------|
| 8  | rs3772616 | noncoding | G A | 0.36 | 0.70 | 0.19 | 0.18 | 0.38 |
| 9  | rs4488792 | noncoding | G A | 0.32 | 0.61 | 0.14 | 0.17 | 0.35 |
| 10 | rs389566  | noncoding | A T | 0.33 | 0.61 | 0.14 | 0.27 | 0.28 |
| 11 | rs385338  | noncoding | G C | 0.26 | 0.51 | 0.14 | 0.18 | 0.21 |
| 12 | rs6801836 | noncoding | A G | 0.24 | 0.37 | 0.11 | 0.24 | 0.23 |
| 13 | rs2320019 | noncoding | A G | 0.12 | 0.36 | 0    | 0.05 | 0.09 |
| 14 | rs275646  | noncoding | G A | 0.07 | 0.05 | 0.15 | 0.04 | 0.04 |
| 15 | rs275645  | noncoding | A G | 0.50 | 0.70 | 0.23 | 0.45 | 0.50 |

**AGTR2**

|   |                |                       |     |      |      |      |       |       |
|---|----------------|-----------------------|-----|------|------|------|-------|-------|
| 1 | rs5950584      | noncoding             | A C | 0.12 | 0.40 | 0    | 0.004 | 0.09* |
| 2 | rs5950586      | noncoding             | G A | 0.01 | 0.03 | 0    | 0     | 0.01  |
| 3 | rs1403543      | noncoding             | A G | 0.48 | 0.36 | 0.43 | 0.49  | 0.38  |
| 4 | rs5190         | coding, synonymous    | A G | 0.01 | 0.01 | 0    | 0     | 0.01  |
| 5 | rs5191 (R248K) | coding, nonsynonymous | G A | 0.01 | 0.03 | 0    | 0     | 0.01  |
| 6 | rs6608590      | noncoding             | G A | 0.47 | 0.40 | 0.41 | 0.48  | 0.37  |

---

\* not in Hardy-Weinberg equilibrium.

# For the M235T polymorphism, the Illumina panel reports an A/G polymorphism. However, the polymorphism has been previously reported as a C/T polymorphism. This discrepancy is due to the forward strand vs. reverse strand analysis.



|       |                    |         |       |       |       |        |       |       |       |       |       |       |       |       |       |        |       |          |       |       |       |       |         |        |        |       |       |      |       |         |        |
|-------|--------------------|---------|-------|-------|-------|--------|-------|-------|-------|-------|-------|-------|-------|-------|-------|--------|-------|----------|-------|-------|-------|-------|---------|--------|--------|-------|-------|------|-------|---------|--------|
| 8     | rs2148582          | 0.24    | 0.07  | 0.27  | 0.12  | 0.06   | 0.01† | 0.52  | 0.99  | 0.27  | 0.23  | 0.19  | 0.04† | 0.99  | 0.51  | 0.55   | 0.55  | 0.15     | 0.37  | HWE   | HWE   | HWE   | HWE     | HWE    | HWE    | 0.29  | 0.16  | 0.35 | 0.21  | 0.008   | 0.001^ |
| 9     | rs7549009          | 0.86    | 0.43  | 0.91  | 0.38  | 0.33   | 0.88  | 0.92  | 0.66  | 0.87  | 0.88  | 0.50  | 0.68  | 0.19  | 0.52  | 0.75   | 0.97  | 0.71     | 0.09  | 0.23  | 0.31  | 0.80  | 0.07    | 0.95   | 0.56   | 0.26  | 0.52  | 0.95 | 0.70  | 0.30    | 0.50   |
| 10    | rs1326886          | 0.36    | 0.53  | 0.33  | 0.60  | 0.51   | 0.71  | 0.98  | 0.79  | 0.96  | 0.88  | 0.52  | 0.66  | 0.77# | 0.70# | 0.81#  | 0.78# | 0.81#    | 0.24# | HWE   | HWE   | HWE   | HWE     | HWE    | HWE    | 0.50  | 0.35  | 0.54 | 0.69  | 0.26    | 0.13   |
| AGTR1 |                    |         |       |       |       |        |       |       |       |       |       |       |       |       |       |        |       |          |       |       |       |       |         |        |        |       |       |      |       |         |        |
| 1     | rs409742           | 0.57    | 0.19  | 0.86  | 0.43  | 0.55   | 0.85  | 0.86  | 0.36  | 0.69  | 0.48  | 0.91  | 0.89  | 0.39  | 0.66  | 0.33   | 0.70  | 0.25     | 0.76  | 0.79  | 0.77  | 0.78  | 0.25    | 0.19   | 0.87   | 0.92  | 0.14  | 0.61 | 0.26  | 0.79    | 0.92   |
| 2     | rs422858           | 0.61    | 0.42  | 0.84  | 0.20  | 0.29   | 0.93  | 0.41# | 0.74# | 0.37# | 0.88# | 0.91# | 0.77# | 0.42  | 0.76  | 0.28   | 0.75  | 0.33     | 0.65  | 0.73  | 0.93  | 0.59  | 0.31    | 0.26   | 0.96   | 0.73  | 0.59  | 0.33 | 0.33  | 0.76    | 0.93   |
| 3     | rs2638363          | 0.66    | 0.04† | 0.78  | 0.04† | 0.76   | 0.60  | 0.27# | 1.00# | 0.33# | 0.84# | 0.33# | 0.27# | 0.42  | 0.79  | 0.24   | 0.73  | 0.31     | 0.67  | 0.77  | 0.70  | 0.78  | 0.45    | 0.24   | 0.85   | 0.97  | 0.15  | 0.36 | 0.17  | 0.59    | 0.43   |
| 4     | rs2131127          | 0.22    | 0.03† | 0.06  | 0.02† | 0.56   | 0.72  | 0.30  | 0.87  | 0.68  | 0.04† | 0.96  | 0.66  | 0.91  | 0.18  | 0.48   | 0.20  | 0.17     | 0.22  | 0.30  | 0.06  | 0.31  | 0.002†  | 0.09   | 0.83   | 0.11  | 0.15  | 0.05 | 0.002 | 0.90    | 0.58   |
| 5     | rs2638360          | 0.53#   | 0.50# | 0.06# | 0.22# | 0.53#  | 0.95# | 0.57# | 0.91# | 0.67# | 0.65# | 0.46# | 0.36# | 0.70  | 0.99  | 0.30   | 0.99  | 0.51     | 0.82  | 0.37# | 0.67# | 0.27# | 0.59#   | 0.01#† | 0.02#† | 0.75  | 0.66  | 0.72 | 0.59  | 0.36    | 0.17   |
| 6     | rs4681443          | 0.36    | 0.05  | 0.21  | 0.02  | 0.92   | 0.50  | 0.66# | 0.13# | 0.88# | 0.70# | 0.43# | 0.97# | 0.12  | 0.23  | 0.18   | 0.67  | 0.91     | 0.58  | HWE   | HWE   | HWE   | HWE     | HWE    | HWE    | 0.53  | 0.65  | 0.91 | 0.21  | 0.71    | 1.00   |
| 7     | rs718858           | 0.15    | 0.10  | 0.70  | 0.15  | 0.42   | 0.53  | 0.66# | 0.13# | 0.88# | 0.70# | 0.43# | 0.97# | 0.19  | 0.19  | 0.26   | 0.62  | 0.61     | 0.41  | 0.23  | 0.31  | 0.20  | 0.0001† | 0.09   | 0.40   | 0.66  | 0.91  | 0.69 | 0.01  | 0.60    | 0.71   |
| 8     | rs3772616          | 0.37    | 0.12  | 0.14  | 0.18  | 0.03†  | 0.06  | 0.88  | 0.83  | 0.57  | 0.17  | 0.63  | 0.28  | 0.89  | 0.11  | 0.36   | 0.93  | 0.69     | 0.45  | 0.95  | 0.24  | 0.66  | 0.05    | 0.06   | 0.03†  | 0.67  | 0.65  | 0.82 | 0.33  | 0.12    | 0.27   |
| 9     | rs4488792          | 0.52    | 0.11  | 0.54  | 0.45  | 0.21   | 0.31  | 0.19  | 0.33  | 0.19  | 0.67  | 0.87  | 0.57  | 0.98  | 0.13  | 0.34   | 0.86  | 0.78     | 0.47  | 0.77  | 0.28  | 0.78  | 0.03†   | 0.02†  | 0.02†  | 0.61  | 0.92  | 0.34 | 0.17  | 0.08    | 0.33   |
| 10    | rs389566           | 0.60    | 0.34  | 0.17  | 0.41  | 0.92   | 0.95  | 0.27  | 0.86  | 0.73  | 0.79  | 0.11  | 0.64  | 0.58  | 0.82  | 0.24   | 0.24  | 0.78     | 0.18  | 0.92  | 0.67  | 0.89  | 0.97    | 0.63   | 1.00   | 0.56  | 0.78  | 0.17 | 0.27  | 0.34    | 0.69   |
| 11    | rs385338           | 0.44    | 0.44  | 0.25  | 0.22  | 0.94   | 0.66  | 0.27  | 0.96  | 0.95  | 0.98  | 0.13  | 0.57  | 0.71  | 0.73  | 0.29   | 0.56  | 0.78     | 0.30  | 0.93  | 0.68  | 0.10  | 0.11    | 0.66   | 0.59   | 0.42  | 0.99  | 0.74 | 0.90  | 0.43    | 0.78   |
| 12    | rs6801836          | 0.34    | 0.60  | 0.90  | 0.33  | 0.75   | 0.92  | 0.45  | 0.95  | 0.71  | 0.30  | 0.19  | 0.68  | 0.67  | 0.68  | 0.13   | 0.51  | 0.51     | 0.24  | 0.89  | 0.92  | 0.40  | 0.93    | 0.88   | 0.66   | 0.81  | 0.66  | 0.20 | 0.20  | 0.68    | 0.52   |
| 13    | rs2320019          | 0.02†   | 0.02† | 0.05  | 0.10  | 0.72   | 0.53  | NP    | NP    | NP    | NP    | NP    | NP    | 0.45# | 0.09# | 0.03#† | 0.35# | 0.86#    | 0.17# | 0.53# | 0.44# | 0.60# | 0.30#   | 0.86#  | 0.91#  | 0.03  | 0.003 | 0.77 | 0.77  | 0.96    | 0.82   |
| 14    | rs275646           | 0.21#   | 0.35# | 0.83# | 0.79# | 0.007† | 0.02† | 0.75  | 0.43  | 0.49  | 0.89  | 0.10  | 0.32  | 0.43# | 0.26# | 0.58#  | 0.58# | 0.09#    | 0.21# | 0.56# | 0.44# | 0.15# | 0.07#   | 0.02#† | 0.13#  | 0.22  | 0.38  | 0.43 | 0.37  | 0.89    | 0.61   |
| 15    | rs275645           | 0.94    | 0.48  | 0.54  | 0.17  | 0.50   | 0.18  | 0.53  | 0.36  | 0.90  | 0.44  | 0.66  | 0.96  | 0.05  | 0.10  | 0.58   | 0.65  | 0.61     | 0.70  | 0.87  | 0.56  | 0.70  | 0.22    | 0.70   | 0.77   | 0.16  | 0.66  | 0.77 | 0.93  | 0.91    | 0.76   |
| AGTR2 |                    |         |       |       |       |        |       |       |       |       |       |       |       |       |       |        |       |          |       |       |       |       |         |        |        |       |       |      |       |         |        |
| 1M    | rs5950584 – M      | 0.43    | 0.34  | 0.08  | 0.31  | 0.28   | 0.21  | NP    | NP    | NP    | NP    | NP    | NP    | 0.30  | 0.08  | 0.40   | 0.99  | 0.00008† | 0.99  | 0.83  | 0.52  | 0.99  | 0.41    | 0.14   | 0.21   | 0.24  | 0.16  | 0.60 | 0.84  | 0.0002^ | 0.16   |
| 1F    | rs5950584 – F      | 0.39    | 0.21  | 0.60  | 0.28  | 0.06   | 0.31  | NP    | NP    | NP    | NP    | NP    | NP    | 0.36# | 0.99# | 0.14#  | 0.99# | 0.98#    | 0.99# | HWE   | HWE   | HWE   | HWE     | HWE    | HWE    | 0.79  | 0.52  | 0.19 | 0.37  | 0.29    | 0.46   |
| 2M    | rs5950586 – M      | 0.42    | 0.59  | 0.64  | 0.46  | 0.33   | 0.61  | NP     | NP    | NP       | NP    | 0.81  | 0.99  | 0.75  | 0.99    | 0.48   | 0.99   | 0.46  | 0.84  | 0.58 | 0.70  | 0.84    | 0.77   |
| 2F    | rs5950586 – F      | 0.79#   | 0.06# | 0.85# | 0.34# | 0.25#  | 0.56# | NP     | NP    | NP       | NP    | 0.51# | 0.68# | 0.60# | 0.62#   | 0.94#  | 0.52#  | 0.51  | 0.31  | 0.61 | 0.31  | 0.38    | 0.97   |
| 3M    | rs1403543 – M      | 0.33    | 0.41  | 0.50  | 0.94  | 0.40   | 0.29  | 0.64  | 0.61  | 0.81  | 0.80  | 0.82  | 0.61  | 0.95  | 0.59  | 0.48   | 0.85  | 0.79     | 0.71  | 0.90  | 0.29  | 0.48  | 0.51    | 0.36   | 0.79   | 0.88  | 0.29  | 0.83 | 0.73  | 0.26    | 0.88   |
| 3F    | rs1403543 – F      | 0.29    | 0.71  | 0.31  | 0.32  | 0.88   | 0.73  | 0.03† | 0.02† | 0.08  | 0.25  | 0.49  | 0.44  | 0.74  | 0.92  | 0.58   | 0.49  | 0.05     | 0.05  | 0.14  | 0.05† | 0.46  | 0.26    | 0.81   | 0.95   | 0.98  | 0.78  | 0.77 | 0.89  | 0.56    | 0.47   |
| 4M    | rs5190 – M         | 0.10    | 0.24  | 0.60  | 0.19  | 0.66   | 0.99  | NP     | NP    | NP       | NP    | 0.19  | 0.16  | 0.18  | 0.23    | 0.29   | 0.99   | 0.04  | 0.07  | 0.19 | 0.08  | 0.29    | 0.98   |
| 4F    | rs5190 – F         | 0.001#† | 0.31# | 0.31# | 0.42# | 0.58#  | 0.67# | NP     | NP    | NP       | NP    | 0.36# | 0.40# | 0.50# | 0.95#   | 0.81#  | 0.98#  | 0.004 | 0.19  | 0.23 | 0.54  | 0.58    | 0.75   |
| 5M    | rs5191 (R248K) – M | 0.79    | 0.39  | 0.68  | 0.98  | 0.13   | 0.36  | NP     | NP    | NP       | NP    | 0.21  | 0.99  | 0.98  | 0.99    | 0.67   | 0.50   | 0.49  | 0.51  | 0.76 | 0.98  | 0.17    | 0.35   |
| 5F    | rs5191 (R248K) – F | 0.29#   | 0.33# | 0.44# | 0.73# | 0.55#  | 0.71# | NP     | NP    | NP       | NP    | 0.16# | 0.18# | 0.82# | 0.61#   | 0.11#  | 1.00#  | 0.80  | 0.79  | 0.69 | 0.90  | 0.48    | 0.79   |
| 6M    | rs6608590 – M      | 0.81    | 0.77  | 0.84  | 0.40  | 0.80   | 0.33  | 0.70  | 0.62  | 0.91  | 0.94  | 0.71  | 0.47  | 0.89  | 0.74  | 0.65   | 0.93  | 0.58     | 0.85  | 0.93  | 0.29  | 0.67  | 0.35    | 0.32   | 0.82   | 0.85  | 0.40  | 0.95 | 0.32  | 0.41    | 0.88   |
| 6F    | rs6608590 – F      | 0.97    | 0.68  | 0.29  | 0.51  | 0.37   | 0.83  | 0.01† | 0.01† | 0.10  | 0.21  | 0.41  | 0.23  | 0.72  | 0.85  | 0.61   | 0.52  | 0.03†    | 0.06  | 0.02† | 0.01† | 0.28  | 0.12    | 0.75   | 0.58   | 0.80  | 0.94  | 0.99 | 0.61  | 0.93    | 0.61   |

# MAF <10%

NP not polymorphic

† Association confirmed by permutation testing using an empiric p value <0.05

HWE: not in Hardy-Weinberg equilibrium

Yellow background: significant (p<0.05) associations in the same direction for the same phenotype in multiple racial/ethnic groups

^ Significant in meta-analysis using adjusted Bonferroni correction

F Female

M Male

**Supplementary Table 4.** P values for haplotype associations with renal phenotypes, adjusted for age, gender, and ancestry. Haplotypes with at least two significant ( $p < 0.05$ ) associations are shown, along with the other haplotypes in the haplotype block. For haplotypes with a minor allele frequency  $< 10\%$  the p value for the association using a dominant model is given. For haplotypes with a minor allele frequency  $\geq 10\%$  the p value for the association using an additive model is given.

| SNPs                    | frequency of haplotype | eGFR | eGFR<60      | Cystatin C eGFR | Cystatin C eGFR<60 | Log UAE      | UAE >17/25   |               |
|-------------------------|------------------------|------|--------------|-----------------|--------------------|--------------|--------------|---------------|
| <b>ACE</b>              |                        |      |              |                 |                    |              |              |               |
| <b>Caucasian</b>        |                        |      |              |                 |                    |              |              |               |
| Block 1                 | T G G A G A A G G G A  | 0.39 | 0.51         | 0.84            | 0.92               | 0.64         | 0.48         | 0.50          |
| 1-2-5-6-7-              | A C A G A G G A A A G  | 0.34 | 0.10         | 0.88            | 0.55               | 0.97         | <b>0.02†</b> | <b>0.01†</b>  |
| 10-11-12-14-            | T G G G A G G A A A G  | 0.10 | 0.95         | 0.76            | 0.66               | 0.53         | 0.35         | 0.54          |
| 15-16                   | T G A G G G G A A A G  | 0.05 | 0.96         | 0.08            | 0.93               | 0.16         | <b>0.04†</b> | 0.23          |
|                         | T G G G G A A G G G A  | 0.04 | 0.24         | 0.42            | 0.09               | <b>0.03†</b> | <b>0.04†</b> | <b>0.02†</b>  |
|                         | T G G A A G G A A A G  | 0.02 | 0.84         | 0.99            | 0.80               | 0.75         | 0.10         | 0.98          |
| <b>Hispanic</b>         |                        |      |              |                 |                    |              |              |               |
| Block 1                 | T G C G A              | 0.48 | 0.83         | 0.10            | 0.43               | <b>0.04†</b> | <b>0.04†</b> | 0.16          |
| 1-2-4-5-7               | A C C A G              | 0.31 | 0.25         | 0.80            | 0.08               | 0.90         | 0.36         | 0.72          |
|                         | T G C G G              | 0.09 | 0.83         | 0.15            | 0.10               | 0.36         | 0.38         | 0.44          |
|                         | T G C A G              | 0.08 | 0.25         | 0.66            | 0.53               | 0.07         | <b>0.02†</b> | <b>0.05†</b>  |
|                         | T C C A G              | 0.02 | 0.12         | <b>0.05†</b>    | 0.45               | 0.64         | 0.30         | 0.14          |
| <b>Hispanic</b>         |                        |      |              |                 |                    |              |              |               |
| Block 2                 | A A A G G A G          | 0.49 | 0.76         | 0.07            | <b>0.04†</b>       | 0.80         | <b>0.04†</b> | 0.06          |
|                         | G G G A A G A          | 0.37 | 0.14         | 0.60            | 0.05               | 0.38         | 0.50         | 0.55          |
|                         | A G G A A G A          | 0.05 | 0.16         | 0.20            | 0.35               | 0.79         | 0.88         | 0.69          |
|                         | A G G A G A G          | 0.02 | 0.78         | 0.55            | 0.72               | 0.79         | 0.73         | 0.25          |
|                         | G G A A A G A          | 0.02 | 0.10         | 0.44            | 0.47               | 0.57         | 0.70         | 0.29          |
| <b>Hispanic</b>         |                        |      |              |                 |                    |              |              |               |
| Block 3                 | A A G A                | 0.51 | 0.44         | 0.43            | 0.83               | 0.33         | <b>0.05†</b> | <b>0.02†</b>  |
| 19-20-21-22             | G G G G                | 0.30 | 0.88         | 0.69            | 0.90               | 0.99         | 0.30         | 0.15          |
|                         | G G G A                | 0.08 | 0.15         | 0.13            | 0.34               | 0.23         | 0.34         | 0.20          |
|                         | G A G A                | 0.04 | <b>0.05†</b> | 0.12            | 0.23               | <b>0.01†</b> | <b>0.03†</b> | <b>0.02†</b>  |
|                         | A G G A                | 0.04 | 0.74         | 0.39            | 0.76               | 0.77         | 0.94         | 0.55          |
|                         | G G A A                | 0.03 | 0.24         | 0.97            | <b>0.005†</b>      | 0.98         | 0.09         | 0.07          |
| <b>AGT</b>              |                        |      |              |                 |                    |              |              |               |
| <b>African American</b> |                        |      |              |                 |                    |              |              |               |
| Block 2                 | G C A G G              | 0.41 | 0.99         | 0.62            | 0.68               | 0.78         | 0.19         | 0.09          |
| 4-5-6-7-8               | A A G G G              | 0.19 | 0.25         | 0.16            | 0.21               | 0.08         | 0.50         | 0.87          |
|                         | G C G A A              | 0.18 | <b>0.03†</b> | 0.07            | 0.15               | 0.30         | 0.05         | <b>0.007†</b> |
|                         | G A G G G              | 0.11 | 0.98         | 0.19            | 0.24               | 0.48         | 0.48         | 0.71          |
|                         | A A A G G              | 0.04 | 0.38         | 0.56            | 0.93               | 0.73         | 0.69         | 0.28          |
|                         | G C G G G              | 0.03 | 0.45         | 0.23            | 0.88               | 0.85         | 0.24         | 0.69          |
|                         | G C G A G              | 0.01 | 0.93         | 0.89            | 0.55               | 0.35         | 0.25         | 0.29          |
| <b>AGTR1</b>            |                        |      |              |                 |                    |              |              |               |

**African American**

|           |   |   |   |   |   |      |      |              |      |              |      |      |
|-----------|---|---|---|---|---|------|------|--------------|------|--------------|------|------|
| Block 1   | G | A | G | A | A | 0.53 | 0.19 | <b>0.01†</b> | 0.18 | <b>0.01†</b> | 0.64 | 0.82 |
| 1-2-3-4-5 | G | A | G | G | A | 0.13 | 0.18 | 0.47         | 0.11 | 0.47         | 0.81 | 0.64 |
|           | G | C | A | G | A | 0.11 | 0.67 | 0.12         | 0.66 | 0.28         | 0.82 | 0.28 |
|           | G | C | A | A | A | 0.08 | 0.65 | 0.71         | 0.69 | 0.53         | 0.49 | 0.27 |
|           | G | A | A | A | A | 0.07 | 0.22 | 0.09         | 0.88 | 0.17         | 0.31 | 0.28 |
|           | G | C | A | G | G | 0.03 | 0.43 | 0.53         | 0.13 | 0.23         | 0.39 | 0.92 |
|           | G | A | A | G | A | 0.03 | 0.13 | 0.50         | 0.36 | 0.24         | 0.43 | 0.31 |

**African American**

|         |   |   |      |      |             |      |              |      |      |
|---------|---|---|------|------|-------------|------|--------------|------|------|
| Block 2 | G | G | 0.39 | 0.36 | <b>0.05</b> | 0.22 | <b>0.02†</b> | 0.89 | 0.51 |
| 6-7     | A | G | 0.37 | 0.70 | 0.63        | 0.37 | 0.30         | 0.40 | 0.22 |
|         | A | A | 0.24 | 0.15 | 0.10        | 0.70 | 0.15         | 0.42 | 0.53 |

**African American**

|          |   |   |   |      |               |              |      |      |               |              |
|----------|---|---|---|------|---------------|--------------|------|------|---------------|--------------|
| Block 5  | A | G | A | 0.36 | <b>0.02†</b>  | <b>0.02†</b> | 0.05 | 0.10 | 0.72          | 0.53         |
| 13-14-15 | G | G | G | 0.30 | 0.94          | 0.48         | 0.54 | 0.17 | 0.50          | 0.18         |
|          | G | G | A | 0.29 | <b>0.003†</b> | 0.23         | 0.13 | 0.88 | 0.10          | 0.05         |
|          | G | A | A | 0.05 | 0.21          | 0.35         | 0.83 | 0.79 | <b>0.007†</b> | <b>0.02†</b> |

**Chinese**

|               |   |   |   |   |   |   |   |      |              |      |              |              |      |      |
|---------------|---|---|---|---|---|---|---|------|--------------|------|--------------|--------------|------|------|
| Block 1       | A | A | G | G | A | G | G | 0.50 | 0.47         | 0.67 | 0.88         | 0.08         | 0.90 | 0.33 |
| 1-2-3-4-5-6-7 | A | A | G | A | A | G | G | 0.30 | 0.36         | 0.32 | 0.87         | <b>0.03†</b> | 0.65 | 0.44 |
|               | A | A | G | A | A | A | A | 0.07 | 0.73         | 0.17 | 0.69         | 0.57         | 0.52 | 0.95 |
|               | G | C | A | G | G | G | G | 0.06 | 0.79         | 0.91 | 0.63         | 0.65         | 0.49 | 0.38 |
|               | G | A | G | G | A | G | G | 0.02 | <b>0.02†</b> | 0.98 | <b>0.03†</b> | 0.98         | 0.84 | 0.89 |
|               | G | C | A | G | A | G | G | 0.02 | 0.23         | 0.15 | 0.17         | 0.80         | 0.92 | 0.66 |

**Hispanic**

|           |   |   |   |   |   |      |              |              |      |               |              |              |
|-----------|---|---|---|---|---|------|--------------|--------------|------|---------------|--------------|--------------|
| Block 1   | A | A | G | G | A | 0.50 | <b>0.03†</b> | <b>0.05†</b> | 0.10 | <b>0.005†</b> | 0.56         | 0.83         |
| 1-2-3-4-5 | A | A | G | A | A | 0.32 | 0.06         | <b>0.03†</b> | 0.23 | <b>0.002†</b> | 0.13         | 0.89         |
|           | G | C | A | G | G | 0.09 | 0.37         | 0.67         | 0.27 | 0.59          | <b>0.01†</b> | <b>0.02†</b> |
|           | G | C | A | G | A | 0.04 | 0.67         | 0.70         | 0.06 | 0.28          | 0.71         | 0.14         |
|           | G | C | A | A | A | 0.03 | 0.18         | 0.71         | 0.71 | 0.37          | 0.48         | 0.25         |
|           | A | A | A | A | A | 0.01 | 0.53         | 0.76         | 0.52 | <b>0.04†</b>  | 0.88         | 0.89         |

**Hispanic**

|         |   |   |      |      |      |              |              |      |      |
|---------|---|---|------|------|------|--------------|--------------|------|------|
| Block 3 | A | G | 0.72 | 0.86 | 0.66 | 0.85         | 0.96         | 0.58 | 0.97 |
| 10-11   | T | C | 0.21 | 1.00 | 0.68 | 0.12         | 0.11         | 0.73 | 0.56 |
|         | T | G | 0.07 | 0.94 | 0.93 | <b>0.02†</b> | <b>0.01†</b> | 0.75 | 0.37 |

**AGTR2****Chinese - female**

|         |   |   |      |              |              |              |      |      |      |
|---------|---|---|------|--------------|--------------|--------------|------|------|------|
| Block 1 | G | A | 0.58 | <b>0.02†</b> | <b>0.01†</b> | <b>0.04†</b> | 0.17 | 0.31 | 0.28 |
| 3-6     | A | G | 0.40 | <b>0.03†</b> | <b>0.02†</b> | 0.16         | 0.30 | 0.61 | 0.37 |

**Caucasian - female**

|         |   |   |      |      |      |      |      |              |             |
|---------|---|---|------|------|------|------|------|--------------|-------------|
| Block 1 | G | A | 0.49 | 0.59 | 0.97 | 0.57 | 0.45 | <b>0.04†</b> | 0.07        |
|         | A | G | 0.49 | 0.88 | 0.79 | 0.62 | 0.56 | <b>0.04†</b> | <b>0.04</b> |

**Hispanic - female**

|         |   |   |      |              |               |      |      |      |      |
|---------|---|---|------|--------------|---------------|------|------|------|------|
| Block 2 | G | G | 0.63 | <b>0.03†</b> | <b>0.01†</b>  | 0.32 | 0.15 | 0.84 | 0.65 |
|         | G | A | 0.36 | <b>0.02†</b> | <b>0.006†</b> | 0.30 | 0.13 | 0.59 | 0.66 |

† Association confirmed by permutation testing using an empiric p value &lt;0.05
